# Supplementary material for: Trichoderma based formulations control the wilt disease of chickpea (Cicer arietinum L.) caused by Fusarium oxysporum f. sp. ciceris, better when inoculated as consortia: findings from pot experiments under field conditions
Source: PeerJ journal article supplement (doi:10.7717/peerj.17835), 2024-08-19
Supplement: supplementary_file_2.zip [file Dual culture.xlsx]

## Sheet: dual culture
		Fusarium oxysporum f. sp. ciceri						Trichoderma asperellum						Trichoderma harzianum II						Trichoderma harzianum I
		Height	Width					Height	Width					Height	Width					Height	Width
	R1	5	7.3	6.15			R1	2.8	4.7	3.75			R1	1.5	3.8	2.65			R1	2.8	3.7	3.25
	R2	4.7	5.8	5.25			R2	2.3	3.9	3.1			R2	2.1	4.4	3.25			R2	2.4	4.5	3.45
	R3	3.5	6.4	4.95			R3	1.8	4.9	3.35			R3	2.4	4.7	3.55			R3	2	4.1	3.05
	Average	4.4	6.5	5.45				2.3	4.5	3.4				2	4.3	3.15				2.4	4.1	3.25
		0.793725	0.754983	0.6245				0.5	0.52915	0.327872				0.458258	0.458258	0.458258				0.4	0.4	0.2
		0.458258	0.43589					0.288675	0.305505					0.264575	0.264575					0.23094	0.23094
				Fusarium 114	Trichoderma asperellum	Trichoderma harzianum II	Trichoderma harzianum I
				5.45	3.4	3.15	3.25
			%inhibition		37.6147	42.2018	40.367
Treatments	Inhibition	Inhibition	Inhibition
Fusarium oxysporum f. sp. ciceri	5	7.3	6.15
Fusarium oxysporum f. sp. ciceri	4.7	5.8	5.25
Fusarium oxysporum f. sp. ciceri	3.5	6.4	4.95
Trichoderma asperellum	2.8	4.7	3.75
Trichoderma asperellum	2.3	3.9	3.1
Trichoderma asperellum	1.8	4.9	3.35
Trichoderma harzianum II	1.5	3.8	2.65
Trichoderma harzianum II	2.1	4.4	3.25
Trichoderma harzianum II	2.4	4.7	3.55
Trichoderma harzianum I	2.8	3.7	3.25
Trichoderma harzianum I	2.4	4.5	3.45
Trichoderma harzianum I	2	4.1	3.05
