# Supplementary material for: Trichoderma based formulations control the wilt disease of chickpea (Cicer arietinum L.) caused by Fusarium oxysporum f. sp. ciceris, better when inoculated as consortia: findings from pot experiments under field conditions
Source: PeerJ journal article supplement (doi:10.7717/peerj.17835), 2024-08-19
Supplement: supplementary_file_2.zip [file For ANOVA year 2 pot.xlsx]

## Sheet: SL y2
Treatment	SL Y2
NC	34.4
NC	32.5
NC	30
PC	25
PC	23
PC	27
T.a conc.1	32.4
T.a conc.1	29.5
T.a conc.1	32.6
T.a conc.2	33.8
T.a conc.2	35.5
T.a conc.2	33
T.h S1 conc.1	37
T.h S1 conc.1	36.1
T.h S1 conc.1	34.6
T.h S1 conc.2	36.6
T.h S1 conc.2	38.5
T.h S1 conc.2	35.3
T.h S2 conc.1	37
T.h S2 conc.1	39
T.h S2 conc.1	35
T.h S2 conc.2	36.5
T.h S2 conc.2	38.2
T.h S2 conc.2	40.8
Cons conc.1	41
Cons conc.1	43
Cons conc.1	39
Cons conc.2	41
Cons conc.2	45
Cons conc.2	43

## Sheet: SFW
Treatment	SFW
NC	15.5
NC	17.4
NC	17.8
PC	9.5
PC	11.6
PC	10.4
T.a conc.1	12.7
T.a conc.1	14.5
T.a conc.1	13
T.a conc.2	15.4
T.a conc.2	14.6
T.a conc.2	13.2
T.h S1 conc.1	16
T.h S1 conc.1	15.6
T.h S1 conc.1	14
T.h S1 conc.2	16.3
T.h S1 conc.2	15.2
T.h S1 conc.2	15.6
T.h S2 conc.1	16.2
T.h S2 conc.1	14.5
T.h S2 conc.1	16.7
T.h S2 conc.2	17.3
T.h S2 conc.2	17.2
T.h S2 conc.2	15
Cons conc.1	17.5
Cons conc.1	18
Cons conc.1	17
Cons conc.2	17.6
Cons conc.2	19
Cons conc.2	18

## Sheet: SDW
Treatment	SDW
NC	8.9
NC	9.8
NC	8.9
PC	6
PC	5.3
PC	6.4
T.a conc.1	7.8
T.a conc.1	7.5
T.a conc.1	6.9
T.a conc.2	8.1
T.a conc.2	7.3
T.a conc.2	8.6
T.h S1 conc.1	8.5
T.h S1 conc.1	9
T.h S1 conc.1	8
T.h S1 conc.2	8.7
T.h S1 conc.2	9.4
T.h S1 conc.2	8.3
T.h S2 conc.1	9.8
T.h S2 conc.1	8.7
T.h S2 conc.1	9.1
T.h S2 conc.2	9.2
T.h S2 conc.2	10.2
T.h S2 conc.2	9.4
Cons conc.1	10
Cons conc.1	10.5
Cons conc.1	9.2
Cons conc.2	11.2
Cons conc.2	10
Cons conc.2	9.7

## Sheet: DS
Treatment	DS
NC	0
NC	0
NC	0
PC	4
PC	3.33
PC	5
T.a conc.1	3.33
T.a conc.1	3.33
T.a conc.1	4
T.a conc.2	3
T.a conc.2	2.66
T.a conc.2	3
T.h S1 conc.1	3
T.h S1 conc.1	2.66
T.h S1 conc.1	3
T.h S1 conc.2	2
T.h S1 conc.2	3
T.h S1 conc.2	3
T.h S2 conc.1	2
T.h S2 conc.1	3
T.h S2 conc.1	3
T.h S2 conc.2	2
T.h S2 conc.2	1.33
T.h S2 conc.2	2
Cons conc.1	2
Cons conc.1	0
Cons conc.1	2
Cons conc.2	0
Cons conc.2	0
Cons conc.2	1

## Sheet: DI
Treatment	DI
NC	0
NC	0
NC	0
PC	3
PC	2
PC	2
T.a conc.1	2
T.a conc.1	2
T.a conc.1	2
T.a conc.2	2
T.a conc.2	1
T.a conc.2	2
T.h S1 conc.1	2
T.h S1 conc.1	1
T.h S1 conc.1	2
T.h S1 conc.2	1
T.h S1 conc.2	1
T.h S1 conc.2	2
T.h S2 conc.1	1
T.h S2 conc.1	2
T.h S2 conc.1	1
T.h S2 conc.2	1
T.h S2 conc.2	1
T.h S2 conc.2	1
Cons conc.1	1
Cons conc.1	0
Cons conc.1	1
Cons conc.2	0
Cons conc.2	0
Cons conc.2	1
