# Supplementary material for: Trichoderma based formulations control the wilt disease of chickpea (Cicer arietinum L.) caused by Fusarium oxysporum f. sp. ciceris, better when inoculated as consortia: findings from pot experiments under field conditions
Source: PeerJ journal article supplement (doi:10.7717/peerj.17835), 2024-08-19
Supplement: supplementary_file_2.zip [file POT YEAR 1.xlsx]

## Sheet: SL POT YEAR 1
	NC	PC	T.a conc.1	T.a conc.2	T.h S1 conc.1	T.h S1 conc.2	T.h S2 conc.1	T.h S2 conc.2	Cons conc.1	Cons conc.2
R1	32.5	23.8	29	32.4	31.2	30.5	32.7	34.5	36.3	36.8
R2	31	23.7	27	27.6	28.5	30.4	31.1	32.3	35.5	39.6
R3	29.5	20	25	28.5	29.4	32.7	30.1	31.6	33.2	37.6
Average	31	22.5	27	29.5	29.7	31.2	31.3	32.8	35	38
S.D	1.5	2.16564	2	2.55147	1.37477	1.3	1.31149	1.51327	1.60935	1.44222							don’t do any thing in this portion
S.E	0.866025	1.25033	1.1547	1.47309	0.793725	0.750555	0.757188	0.873689	0.929157	0.832666
	GRAPH		ANOVA
	NIC	31	cd
	IC	22.5	f
	T.a conc.1	27	e										Decrease over negative
	T.a conc.2	29.5	de
	T.h S1 conc.1	29.7	de														Percentile Graph
	T.h S1 conc.2	31.2	cd														PC	T.a conc.1	T.a conc.2	T.h S1 conc.1	T.h S1 conc.2	T.h S2 conc.1	T.h S2 conc.2	Cons conc.1	Cons conc.2
	T.h S2 conc.1	31.3	cd														8.5	4	1.5	1.3	-0.2	-0.3	-1.8	-4	-7
	T.h S2 conc.2	32.8	bc														0.274194	0.129032	0.0483871	0.0419355	-0.00645161	-0.00967742	-0.0580645	-0.129032	-0.225806
	Cons conc.1	35	b														PC	T.a conc.1	T.a conc.2	T.h S1 conc.1	T.h S1 conc.2	T.h S2 conc.1	T.h S2 conc.2	Cons conc.1	Cons conc.2
	Cons conc.2	38	a														27.4194	12.9032	4.83871	4.19355	-0.645161	-0.967742	-5.80645	-12.9032	-22.5806
																	0.274194	0.129032	0.0483871	0.0419355	-0.00645161	-0.00967742	-0.0580645	-0.129032	-0.225806
																	PC	T.a conc.1	T.a conc.2	T.h S1 conc.1	T.h S1 conc.2	T.h S2 conc.1	T.h S2 conc.2	Cons conc.1	Cons conc.2
													Increase over over positive					-4.5	-7	-7.2	-8.7	-8.8	-10.3	-12.5	-15.5
																		-0.2	-0.311111	-0.32	-0.386667	-0.391111	-0.457778	-0.555556	-0.688889
																	PC	T.a conc.1	T.a conc.2	T.h S1 conc.1	T.h S1 conc.2	T.h S2 conc.1	T.h S2 conc.2	Cons conc.1	Cons conc.2
Don't touch it																		-20	-31.1111	-32	-38.6667	-39.1111	-45.7778	-55.5556	-68.8889
For ANOVA																		-0.2	-0.311111	-0.32	-0.386667	-0.391111	-0.457778	-0.555556	-0.688889
Treatment	Values
NC	32.5
NC	31
NC	29.5
PC	23.8
PC	23.7
PC	20
T.a conc.1	29
T.a conc.1	27
T.a conc.1	25
T.a conc.2	32.4
T.a conc.2	27.6
T.a conc.2	28.5
T.h S1 conc.1	31.2
T.h S1 conc.1	28.5
T.h S1 conc.1	29.4
T.h S1 conc.2	30.5
T.h S1 conc.2	30.4
T.h S1 conc.2	32.7
T.h S2 conc.1	32.7
T.h S2 conc.1	31.1
T.h S2 conc.1	30.1
T.h S2 conc.2	34.5
T.h S2 conc.2	32.3
T.h S2 conc.2	31.6
Cons conc.1	36.3
Cons conc.1	35.5
Cons conc.1	33.2
Cons conc.2	36.8
Cons conc.2	39.6
Cons conc.2	37.6

## Sheet: FRESH SHOOT WT POT YEAR 1
	NC	PC	T.a conc.1	T.a conc.2	T.h S1 conc.1	T.h S1 conc.2	T.h S2 conc.1	T.h S2 conc.2	Cons conc.1	Cons conc.2
R1	16	9.6	11.5	10.41	10.1	10.9	12.8	13	14.7	13.3		12.8
R2	15.5	8.5	9.7	12.34	12.7	12.8	12.6	13.3	14	15.7		12.6
R3	14.4	8	10.3	11.6	11.4	12	10.6	11.2	13	14.5		10.6
Average	15.3	8.7	10.5	11.45	11.4	11.9	12	12.5	13.9	14.5
S.D	0.818535	0.818535	0.916515	0.973704	1.3	0.953939	1.21655	1.13578	0.8544	1.2							don’t do any thing in this portion
S.E	0.472582	0.472582	0.52915	0.562168	0.750555	0.550757	0.702377	0.655744	0.493288	0.69282
	GRAPH		ANOVA
	NIC	15.3	a
	IC	8.7	e
	T.a conc.1	10.5	d										Decrease over negative
	T.a conc.2	11.45	cd
	T.h S1 conc.1	11.4	cd														Percentile Graph
	T.h S1 conc.2	11.9	cd														PC	T.a conc.1	T.a conc.2	T.h S1 conc.1	T.h S1 conc.2	T.h S2 conc.1	T.h S2 conc.2	Cons conc.1	Cons conc.2
	T.h S2 conc.1	12	cd														6.6	4.8	3.85	3.9	3.4	3.3	2.8	1.4	0.8
	T.h S2 conc.2	12.5	bc														0.431373	0.313725	0.251634	0.254902	0.222222	0.215686	0.183007	0.0915033	0.0522876
	Cons conc.1	13.9	ab														PC	T.a conc.1	T.a conc.2	T.h S1 conc.1	T.h S1 conc.2	T.h S2 conc.1	T.h S2 conc.2	Cons conc.1	Cons conc.2
	Cons conc.2	14.5	a														43.1373	31.3725	25.1634	25.4902	22.2222	21.5686	18.3007	9.15033	5.22876
																	0.431373	0.313725	0.251634	0.254902	0.222222	0.215686	0.183007	0.0915033	0.0522876
																	PC	T.a conc.1	T.a conc.2	T.h S1 conc.1	T.h S1 conc.2	T.h S2 conc.1	T.h S2 conc.2	Cons conc.1	Cons conc.2
													Increase over over positive					-1.8	-2.75	-2.7	-3.2	-3.3	-3.8	-5.2	-5.8
																		-0.206897	-0.316092	-0.310345	-0.367816	-0.37931	-0.436782	-0.597701	-0.666667
																	PC	T.a conc.1	T.a conc.2	T.h S1 conc.1	T.h S1 conc.2	T.h S2 conc.1	T.h S2 conc.2	Cons conc.1	Cons conc.2
Don't touch it																		-20.6897	-31.6092	-31.0345	-36.7816	-37.931	-43.6782	-59.7701	-66.6667
For ANOVA																		-0.206897	-0.316092	-0.310345	-0.367816	-0.37931	-0.436782	-0.597701	-0.666667
Treatment	Values
NC	16
NC	15.5
NC	14.4
PC	9.6
PC	8.5
PC	8
T.a conc.1	11.5
T.a conc.1	9.7
T.a conc.1	10.3
T.a conc.2	10.41
T.a conc.2	12.34
T.a conc.2	11.6
T.h S1 conc.1	10.1
T.h S1 conc.1	12.7
T.h S1 conc.1	11.4
T.h S1 conc.2	10.9
T.h S1 conc.2	12.8
T.h S1 conc.2	12
T.h S2 conc.1	12.8
T.h S2 conc.1	12.6
T.h S2 conc.1	10.6
T.h S2 conc.2	13
T.h S2 conc.2	13.3
T.h S2 conc.2	11.2
Cons conc.1	14.7
Cons conc.1	14
Cons conc.1	13
Cons conc.2	13.3
Cons conc.2	15.7
Cons conc.2	14.5

## Sheet: DRY SHOOT WT POT YEAR 1
	NC	PC	T.a conc.1	T.a conc.2	T.h S1 conc.1	T.h S1 conc.2	T.h S2 conc.1	T.h S2 conc.2	Cons conc.1	Cons conc.2
R1	8	5.6	6.6	7.1	7.2	7.3	7.4	7.5	8.2	9
R2	9	4.6	5.6	6.5	6.4	7	6.8	7.2	8	8.5
R3	8.5	4.8	6.1	6.2	6.2	6.4	6.3	6.6	7.2	7.7
Average	8.5	5	6.1	6.6	6.6	6.9	6.83333	7.1	7.8	8.4
S.D	0.5	0.52915	0.5	0.458258	0.52915	0.458258	0.550757	0.458258	0.52915	0.655744							don’t do any thing in this portion
S.E	0.288675	0.305505	0.288675	0.264575	0.305505	0.264575	0.31798	0.264575	0.305505	0.378594
	GRAPH		ANOVA
	NIC	8.5	a
	IC	5	e										Decrease over negative
	T.a conc.1	6.1	d
	T.a conc.2	6.6	cd
	T.h S1 conc.1	6.6	cd														Percentile Graph
	T.h S1 conc.2	6.9	cd														PC	T.a conc.1	T.a conc.2	T.h S1 conc.1	T.h S1 conc.2	T.h S2 conc.1	T.h S2 conc.2	Cons conc.1	Cons conc.2
	T.h S2 conc.1	6.83333	cd														3.5	2.4	1.9	1.9	1.6	1.66667	1.4	0.7	0.1
	T.h S2 conc.2	7.1	bc														0.411765	0.282353	0.223529	0.223529	0.188235	0.196078	0.164706	0.0823529	0.0117647
	Cons conc.1	7.8	ab														PC	T.a conc.1	T.a conc.2	T.h S1 conc.1	T.h S1 conc.2	T.h S2 conc.1	T.h S2 conc.2	Cons conc.1	Cons conc.2
	Cons conc.2	8.4	a														41.1765	28.2353	22.3529	22.3529	18.8235	19.6078	16.4706	8.23529	1.17647
																	0.411765	0.282353	0.223529	0.223529	0.188235	0.196078	0.164706	0.0823529	0.0117647
													Increase over over positive				PC	T.a conc.1	T.a conc.2	T.h S1 conc.1	T.h S1 conc.2	T.h S2 conc.1	T.h S2 conc.2	Cons conc.1	Cons conc.2
																		-1.1	-1.6	-1.6	-1.9	-1.83333	-2.1	-2.8	-3.4
																		-0.22	-0.32	-0.32	-0.38	-0.366667	-0.42	-0.56	-0.68
																	PC	T.a conc.1	T.a conc.2	T.h S1 conc.1	T.h S1 conc.2	T.h S2 conc.1	T.h S2 conc.2	Cons conc.1	Cons conc.2
Don't touch it																		-22	-32	-32	-38	-36.6667	-42	-56	-68
For ANOVA																		-0.22	-0.32	-0.32	-0.38	-0.366667	-0.42	-0.56	-0.68
Treatment	Values
NC	8
NC	9
NC	8.5
PC	5.6
PC	4.6
PC	4.8
T.a conc.1	6.6
T.a conc.1	5.6
T.a conc.1	6.1
T.a conc.2	7.1
T.a conc.2	6.5
T.a conc.2	6.2
T.h S1 conc.1	7.2
T.h S1 conc.1	6.4
T.h S1 conc.1	6.2
T.h S1 conc.2	7.3
T.h S1 conc.2	7
T.h S1 conc.2	6.4
T.h S2 conc.1	7.4
T.h S2 conc.1	6.8
T.h S2 conc.1	6.3
T.h S2 conc.2	7.5
T.h S2 conc.2	7.2
T.h S2 conc.2	6.6
Cons conc.1	8.2
Cons conc.1	8
Cons conc.1	7.2
Cons conc.2	9
Cons conc.2	8.5
Cons conc.2	7.7

## Sheet: Table DS POT YEAR 1
	NC	PC	T.a conc.1	T.a conc.2	T.h S1 conc.1	T.h S1 conc.2	T.h S2 conc.1	T.h S2 conc.2	Cons conc.1	Cons conc.2
R1	0	4.33	4	3.7	2.7	3	2.7	2.7	2.7	0
R2	0	4.67	4.33	4.33	4.3	4	2.7	2.7	0	1
R3	0	5	2.7	2.7	3	2.7	3	2	1.33	1
Average	0	4.66667	3.67667	3.57667	3.33333	3.23333	2.8	2.46667	1.34333	0.666667
S.D	0	0.335012	0.861762	0.821969	0.85049	0.680686	0.173205	0.404145	1.35005	0.57735							don’t do any thing in this portion
S.E	0	0.19342	0.497538	0.474564	0.491031	0.392994	0.1	0.233333	0.779451	0.333333
	GRAPH		ANOVA
	NC	0	e
	PC	4.66667	a
	T.a conc.1	3.67667	ab										Decrease over negative
	T.a conc.2	3.57667	ab
	T.h S1 conc.1	3.33333	b														Percentile Graph
	T.h S1 conc.2	3.23333	b														PC	T.a conc.1	T.a conc.2	T.h S1 conc.1	T.h S1 conc.2	T.h S2 conc.1	T.h S2 conc.2	Cons conc.1	Cons conc.2
	T.h S2 conc.1	2.8	b														-4.66667	-3.67667	-3.57667	-3.33333	-3.23333	-2.8	-2.46667	-1.34333	-0.666667
	T.h S2 conc.2	2.46667	bc														#DIV/0!	#DIV/0!	#DIV/0!	#DIV/0!	#DIV/0!	#DIV/0!	#DIV/0!	#DIV/0!	#DIV/0!
	Cons conc.1	1.34333	cd														PC	T.a conc.1	T.a conc.2	T.h S1 conc.1	T.h S1 conc.2	T.h S2 conc.1	T.h S2 conc.2	Cons conc.1	Cons conc.2
	Cons conc.2	0.666667	de														#DIV/0!	#DIV/0!	#DIV/0!	#DIV/0!	#DIV/0!	#DIV/0!	#DIV/0!	#DIV/0!	#DIV/0!
																	#DIV/0!	#DIV/0!	#DIV/0!	#DIV/0!	#DIV/0!	#DIV/0!	#DIV/0!	#DIV/0!	#DIV/0!
																	PC	T.a conc.1	T.a conc.2	T.h S1 conc.1	T.h S1 conc.2	T.h S2 conc.1	T.h S2 conc.2	Cons conc.1	Cons conc.2
													Increase over over positive					0.99	1.09	1.33333	1.43333	1.86667	2.2	3.32333	4
																		0.212143	0.233571	0.285714	0.307143	0.4	0.471429	0.712143	0.857143
																	PC	T.a conc.1	T.a conc.2	T.h S1 conc.1	T.h S1 conc.2	T.h S2 conc.1	T.h S2 conc.2	Cons conc.1	Cons conc.2
Don't touch it																		21.2143	23.3571	28.5714	30.7143	40	47.1429	71.2143	85.7143
For ANOVA																		0.212143	0.233571	0.285714	0.307143	0.4	0.471429	0.712143	0.857143
Treatment	Values
NC	0
NC	0
NC	0
PC	4.33
PC	4.67
PC	5
T.a conc.1	4
T.a conc.1	4.33
T.a conc.1	2.7
T.a conc.2	3.7
T.a conc.2	4.33
T.a conc.2	2.7
T.h S1 conc.1	2.7
T.h S1 conc.1	4.3
T.h S1 conc.1	3
T.h S1 conc.2	3
T.h S1 conc.2	4
T.h S1 conc.2	2.7
T.h S2 conc.1	2.7
T.h S2 conc.1	2.7
T.h S2 conc.1	3
T.h S2 conc.2	2.7
T.h S2 conc.2	2.7
T.h S2 conc.2	2
Cons conc.1	2.7
Cons conc.1	0
Cons conc.1	1.33
Cons conc.2	0
Cons conc.2	1
Cons conc.2	1

## Sheet:  Table DI POT YEAR 1
	NC	PC	T.a conc.1	T.a conc.2	T.h S1 conc.1	T.h S1 conc.2	T.h S2 conc.1	T.h S2 conc.2	Cons conc.1	Cons conc.2
R1	0	2	2	1	1	1	1	1	2	0
R2	0	3	3	3	3	2	2	1	0	1
R3	0	3	2	2	2	2	1	1	1	1
Average	0	2.66667	2.33333	2	2	1.66667	1.33333	1	1	0.666667
DI	0	88.8889	77.7778	66.6667	66.6667	55.5556	44.4444	33.3333	33.3333	22.2222
S.D	0	0.57735	0.57735	1	1	0.57735	0.57735	0	1	0.57735							don’t do any thing in this portion
S.E	0	0.333333	0.333333	0.57735	0.57735	0.333333	0.333333	0	0.57735	0.333333
	GRAPH		ANOVA
	NC	0	e
	PC	88.8889	a
	T.a conc.1	77.7778	ab
	T.a conc.2	66.6667	a-c										Decrease over negative
	T.h S1 conc.1	66.6667	a-c														Percentile Graph
	T.h S1 conc.2	55.5556	a-d														PC	T.a conc.1	T.a conc.2	T.h S1 conc.1	T.h S1 conc.2	T.h S2 conc.1	T.h S2 conc.2	Cons conc.1	Cons conc.2
	T.h S2 conc.1	44.4444	b-d														-2.66667	-2.33333	-2	-2	-1.66667	-1.33333	-1	-1	-0.666667
	T.h S2 conc.2	33.3333	c-e														#DIV/0!	#DIV/0!	#DIV/0!	#DIV/0!	#DIV/0!	#DIV/0!	#DIV/0!	#DIV/0!	#DIV/0!
	Cons conc.1	33.3333	c-e														PC	T.a conc.1	T.a conc.2	T.h S1 conc.1	T.h S1 conc.2	T.h S2 conc.1	T.h S2 conc.2	Cons conc.1	Cons conc.2
	Cons conc.2	22.2222	de														#DIV/0!	#DIV/0!	#DIV/0!	#DIV/0!	#DIV/0!	#DIV/0!	#DIV/0!	#DIV/0!	#DIV/0!
																	#DIV/0!	#DIV/0!	#DIV/0!	#DIV/0!	#DIV/0!	#DIV/0!	#DIV/0!	#DIV/0!	#DIV/0!
																	PC	T.a conc.1	T.a conc.2	T.h S1 conc.1	T.h S1 conc.2	T.h S2 conc.1	T.h S2 conc.2	Cons conc.1	Cons conc.2
																		0.333333	0.666667	0.666667	1	1.33333	1.66667	1.66667	2
													Increase over over positive					0.125	0.25	0.25	0.375	0.5	0.625	0.625	0.75
																	PC	T.a conc.1	T.a conc.2	T.h S1 conc.1	T.h S1 conc.2	T.h S2 conc.1	T.h S2 conc.2	Cons conc.1	Cons conc.2
Don't touch it																		12.5	25	25	37.5	50	62.5	62.5	75
For ANOVA																		0.125	0.25	0.25	0.375	0.5	0.625	0.625	0.75
Treatment	Values
NC	0
NC	0
NC	0
PC	2
PC	3
PC	3
T.a conc.1	2
T.a conc.1	3
T.a conc.1	2
T.a conc.2	1
T.a conc.2	3
T.a conc.2	2
T.h S1 conc.1	1
T.h S1 conc.1	3
T.h S1 conc.1	2
T.h S1 conc.2	1
T.h S1 conc.2	2
T.h S1 conc.2	2
T.h S2 conc.1	1
T.h S2 conc.1	2
T.h S2 conc.1	1
T.h S2 conc.2	1
T.h S2 conc.2	1
T.h S2 conc.2	1
Cons conc.1	2
Cons conc.1	0
Cons conc.1	1
Cons conc.2	0
Cons conc.2	1
Cons conc.2	1
