# Supplementary material for: Trichoderma based formulations control the wilt disease of chickpea (Cicer arietinum L.) caused by Fusarium oxysporum f. sp. ciceris, better when inoculated as consortia: findings from pot experiments under field conditions
Source: PeerJ journal article supplement (doi:10.7717/peerj.17835), 2024-08-19
Supplement: supplementary_file_2.zip [file POT YEAR 2.xlsx]

## Sheet: SL POT YEAR 2
	32.3	25	31.5	34.1	35.9	36.8	37	38.5	41	43
	NC	PC	T.a conc.1	T.a conc.2	T.h S1 conc.1	T.h S1 conc.2	T.h S2 conc.1	T.h S2 conc.2	Cons conc.1	Cons conc.2
R1	34.4	25	32.4	33.8	37	36.6	37	36.5	41	41
R2	32.5	23	29.5	35.5	36.1	38.5	39	38.2	43	45
R3	30	27	32.6	33	34.6	35.3	35	40.8	39	43
Average	32.3	25	31.5	34.1	35.9	36.8	37	38.5	41	43
S.D	2.20681	2	1.73494	1.27671	1.21244	1.60935	2	2.16564	2	2							don’t do any thing in this portion
S.E	1.2741	1.1547	1.00167	0.737111	0.7	0.929157	1.1547	1.25033	1.1547	1.1547
	GRAPH		ANOVA
	NIC	32.3	e
	IC	25	f
	T.a conc.1	31.5	e
	T.a conc.2	34.1	de
	T.h S1 conc.1	35.9	cd										Decrease over negative				Percentile Graph
	T.h S1 conc.2	36.8	cd														PC	T.a conc.1	T.a conc.2	T.h S1 conc.1	T.h S1 conc.2	T.h S2 conc.1	T.h S2 conc.2	Cons conc.1	Cons conc.2
	T.h S2 conc.1	37	cd														7.3	0.8	-1.8	-3.6	-4.5	-4.7	-6.2	-8.7	-10.7
	T.h S2 conc.2	38.5	bc														0.226006	0.0247678	-0.0557276	-0.111455	-0.139319	-0.145511	-0.19195	-0.26935	-0.331269
	Cons conc.1	41	ab														PC	T.a conc.1	T.a conc.2	T.h S1 conc.1	T.h S1 conc.2	T.h S2 conc.1	T.h S2 conc.2	Cons conc.1	Cons conc.2
	Cons conc.2	43	a														22.6006	2.47678	-5.57276	-11.1455	-13.9319	-14.5511	-19.195	-26.935	-33.1269
																	0.226006	0.0247678	-0.0557276	-0.111455	-0.139319	-0.145511	-0.19195	-0.26935	-0.331269
																	PC	T.a conc.1	T.a conc.2	T.h S1 conc.1	T.h S1 conc.2	T.h S2 conc.1	T.h S2 conc.2	Cons conc.1	Cons conc.2
																		-6.5	-9.1	-10.9	-11.8	-12	-13.5	-16	-18
																		-0.26	-0.364	-0.436	-0.472	-0.48	-0.54	-0.64	-0.72
													Increase over over positive				PC	T.a conc.1	T.a conc.2	T.h S1 conc.1	T.h S1 conc.2	T.h S2 conc.1	T.h S2 conc.2	Cons conc.1	Cons conc.2
Don't touch it																		-26	-36.4	-43.6	-47.2	-48	-54	-64	-72
For ANOVA																		-0.26	-0.364	-0.436	-0.472	-0.48	-0.54	-0.64	-0.72
Treatment	Values
NC	34.4
NC	32.5
NC	30
PC	25
PC	23
PC	27
T.a conc.1	32.4
T.a conc.1	29.5
T.a conc.1	32.6
T.a conc.2	33.8
T.a conc.2	35.5
T.a conc.2	33
T.h S1 conc.1	37
T.h S1 conc.1	36.1
T.h S1 conc.1	34.6
T.h S1 conc.2	36.6
T.h S1 conc.2	38.5
T.h S1 conc.2	35.3
T.h S2 conc.1	37
T.h S2 conc.1	39
T.h S2 conc.1	35
T.h S2 conc.2	36.5
T.h S2 conc.2	38.2
T.h S2 conc.2	40.8
Cons conc.1	41
Cons conc.1	43
Cons conc.1	39
Cons conc.2	41
Cons conc.2	45
Cons conc.2	43

## Sheet: FRESH SHOOT WT POT YEAR 2
	16.9	10.5	13.4	14.4	15.2	15.7	15.8	16.5	17.5	18.2
	NC	PC	T.a conc.1	T.a conc.2	T.h S1 conc.1	T.h S1 conc.2	T.h S2 conc.1	T.h S2 conc.2	Cons conc.1	Cons conc.2
R1	15.5	9.5	12.7	15.4	16	16.3	16.2	17.3	17.5	17.6
R2	17.4	11.6	14.5	14.6	15.6	15.2	14.5	17.2	18	19
R3	17.8	10.4	13	13.2	14	15.6	16.7	15	17	18
Average	16.9	10.5	13.4	14.4	15.2	15.7	15.8	16.5	17.5	18.2
S.D	1.22882	1.05357	0.964365	1.11355	1.0583	0.556776	1.15326	1.3	0.5	0.72111							don’t do any thing in this portion
S.E	0.70946	0.608276	0.556776	0.64291	0.61101	0.321455	0.665833	0.750555	0.288675	0.416333
	GRAPH		ANOVA
	NIC	16.9	a-c
	IC	10.5	f
	T.a conc.1	13.4	e
	T.a conc.2	14.4	de		S
	T.h S1 conc.1	15.2	cd										Decrease over negative				Percentile Graph
	T.h S1 conc.2	15.7	cd														PC	T.a conc.1	T.a conc.2	T.h S1 conc.1	T.h S1 conc.2	T.h S2 conc.1	T.h S2 conc.2	Cons conc.1	Cons conc.2
	T.h S2 conc.1	15.8	b-d														6.4	3.5	2.5	1.7	1.2	1.1	0.4	-0.6	-1.3
	T.h S2 conc.2	16.5	a-c														0.378698	0.207101	0.147929	0.100592	0.0710059	0.0650888	0.0236686	-0.035503	-0.0769231
	Cons conc.1	17.5	ab														PC	T.a conc.1	T.a conc.2	T.h S1 conc.1	T.h S1 conc.2	T.h S2 conc.1	T.h S2 conc.2	Cons conc.1	Cons conc.2
	Cons conc.2	18.2	a														37.8698	20.7101	14.7929	10.0592	7.10059	6.50888	2.36686	-3.5503	-7.69231
																	0.378698	0.207101	0.147929	0.100592	0.0710059	0.0650888	0.0236686	-0.035503	-0.0769231
																	PC	T.a conc.1	T.a conc.2	T.h S1 conc.1	T.h S1 conc.2	T.h S2 conc.1	T.h S2 conc.2	Cons conc.1	Cons conc.2
																		-2.9	-3.9	-4.7	-5.2	-5.3	-6	-7	-7.7
																		-0.27619	-0.371429	-0.447619	-0.495238	-0.504762	-0.571429	-0.666667	-0.733333
													Increase over over positive				PC	T.a conc.1	T.a conc.2	T.h S1 conc.1	T.h S1 conc.2	T.h S2 conc.1	T.h S2 conc.2	Cons conc.1	Cons conc.2
Don't touch it																		-27.619	-37.1429	-44.7619	-49.5238	-50.4762	-57.1429	-66.6667	-73.3333
For ANOVA																		-0.27619	-0.371429	-0.447619	-0.495238	-0.504762	-0.571429	-0.666667	-0.733333
Treatment	Values
NC	15.5
NC	17.4
NC	17.8
PC	9.5
PC	11.6
PC	10.4
T.a conc.1	12.7
T.a conc.1	14.5
T.a conc.1	13
T.a conc.2	15.4
T.a conc.2	14.6
T.a conc.2	13.2
T.h S1 conc.1	16
T.h S1 conc.1	15.6
T.h S1 conc.1	14
T.h S1 conc.2	16.3
T.h S1 conc.2	15.2
T.h S1 conc.2	15.6
T.h S2 conc.1	16.2
T.h S2 conc.1	14.5
T.h S2 conc.1	16.7
T.h S2 conc.2	17.3
T.h S2 conc.2	17.2
T.h S2 conc.2	15
Cons conc.1	17.5
Cons conc.1	18
Cons conc.1	17
Cons conc.2	17.6
Cons conc.2	19
Cons conc.2	18

## Sheet: DRY SHOOT WT POT YEAR 2
	9.2	5.9	7.4	8	8.5	8.8	9.2	9.6	9.9	10.3
	NC	PC	T.a conc.1	T.a conc.2	T.h S1 conc.1	T.h S1 conc.2	T.h S2 conc.1	T.h S2 conc.2	Cons conc.1	Cons conc.2
R1	8.9	6	7.8	8.1	8.5	8.7	9.8	9.2	10	11.2
R2	9.8	5.3	7.5	7.3	9	9.4	8.7	10.2	10.5	10
R3	8.9	6.4	6.9	8.6	8	8.3	9.1	9.4	9.2	9.7
Average	9.2	5.9	7.4	8	8.5	8.8	9.2	9.6	9.9	10.3
S.D	0.519615	0.556776	0.458258	0.655744	0.5	0.556776	0.556776	0.52915	0.655744	0.793725							don’t do any thing in this portion
S.E	0.3	0.321455	0.264575	0.378594	0.288675	0.321455	0.321455	0.305505	0.378594	0.458258
	GRAPH		ANOVA
	NIC	9.2	b-d
	IC	5.9	g
	T.a conc.1	7.4	f										Decrease over negative
	T.a conc.2	8	ef
	T.h S1 conc.1	8.5	de														Percentile Graph
	T.h S1 conc.2	8.8	c-e														PC	T.a conc.1	T.a conc.2	T.h S1 conc.1	T.h S1 conc.2	T.h S2 conc.1	T.h S2 conc.2	Cons conc.1	Cons conc.2
	T.h S2 conc.1	9.2	b-d														3.3	1.8	1.2	0.7	0.4	0	-0.4	-0.7	-1.1
	T.h S2 conc.2	9.6	a-c														0.358696	0.195652	0.130435	0.076087	0.0434783	0	-0.0434783	-0.076087	-0.119565
	Cons conc.1	9.9	ab														PC	T.a conc.1	T.a conc.2	T.h S1 conc.1	T.h S1 conc.2	T.h S2 conc.1	T.h S2 conc.2	Cons conc.1	Cons conc.2
	Cons conc.2	10.3	a														35.8696	19.5652	13.0435	7.6087	4.34783	0	-4.34783	-7.6087	-11.9565
																	0.358696	0.195652	0.130435	0.076087	0.0434783	0	-0.0434783	-0.076087	-0.119565
																	PC	T.a conc.1	T.a conc.2	T.h S1 conc.1	T.h S1 conc.2	T.h S2 conc.1	T.h S2 conc.2	Cons conc.1	Cons conc.2
													Increase over over positive					-1.5	-2.1	-2.6	-2.9	-3.3	-3.7	-4	-4.4
																		-0.254237	-0.355932	-0.440678	-0.491525	-0.559322	-0.627119	-0.677966	-0.745763
																	PC	T.a conc.1	T.a conc.2	T.h S1 conc.1	T.h S1 conc.2	T.h S2 conc.1	T.h S2 conc.2	Cons conc.1	Cons conc.2
Don't touch it																		-25.4237	-35.5932	-44.0678	-49.1525	-55.9322	-62.7119	-67.7966	-74.5763
For ANOVA																		-0.254237	-0.355932	-0.440678	-0.491525	-0.559322	-0.627119	-0.677966	-0.745763
Treatment	Values
NC	8.9
NC	9.8
NC	8.9
PC	6
PC	5.3
PC	6.4
T.a conc.1	7.8
T.a conc.1	7.5
T.a conc.1	6.9
T.a conc.2	8.1
T.a conc.2	7.3
T.a conc.2	8.6
T.h S1 conc.1	8.5
T.h S1 conc.1	9
T.h S1 conc.1	8
T.h S1 conc.2	8.7
T.h S1 conc.2	9.4
T.h S1 conc.2	8.3
T.h S2 conc.1	9.8
T.h S2 conc.1	8.7
T.h S2 conc.1	9.1
T.h S2 conc.2	9.2
T.h S2 conc.2	10.2
T.h S2 conc.2	9.4
Cons conc.1	10
Cons conc.1	10.5
Cons conc.1	9.2
Cons conc.2	11.2
Cons conc.2	10
Cons conc.2	9.7

## Sheet: Table DS POT YEAR 2
	0	4.11	3.55	2.88	2.88	2.66	2.66	1.77	1.33	0.33
	NC	PC	T.a conc.1	T.a conc.2	T.h S1 conc.1	T.h S1 conc.2	T.h S2 conc.1	T.h S2 conc.2	Cons conc.1	Cons conc.2
R1	0	4	3.33	3	3	2	2	2	2	0
R2	0	3.33	3.33	2.66	2.66	3	3	1.33	0	0
R3	0	5	4	3	3	3	3	2	2	1
Average	0	4.11	3.55333	2.88667	2.88667	2.66667	2.66667	1.77667	1.33333	0.333333
S.D	0	0.840417	0.386825	0.196299	0.196299	0.57735	0.57735	0.386825	1.1547	0.57735							don’t do any thing in this portion
S.E	0	0.485215	0.223333	0.113333	0.113333	0.333333	0.333333	0.223333	0.666667	0.333333
	GRAPH		ANOVA
	NC	0	f
	PC	4.11	a
	T.a conc.1	3.55333	ab
	T.a conc.2	2.88667	b										Decrease over negative
	T.h S1 conc.1	2.88667	b														Percentile Graph
	T.h S1 conc.2	2.66667	bc														PC	T.a conc.1	T.a conc.2	T.h S1 conc.1	T.h S1 conc.2	T.h S2 conc.1	T.h S2 conc.2	Cons conc.1	Cons conc.2
	T.h S2 conc.1	2.66667	bc														-4.11	-3.55333	-2.88667	-2.88667	-2.66667	-2.66667	-1.77667	-1.33333	-0.333333
	T.h S2 conc.2	1.77667	cd														#DIV/0!	#DIV/0!	#DIV/0!	#DIV/0!	#DIV/0!	#DIV/0!	#DIV/0!	#DIV/0!	#DIV/0!
	Cons conc.1	1.33333	d														PC	T.a conc.1	T.a conc.2	T.h S1 conc.1	T.h S1 conc.2	T.h S2 conc.1	T.h S2 conc.2	Cons conc.1	Cons conc.2
	Cons conc.2	0.333333	e														#DIV/0!	#DIV/0!	#DIV/0!	#DIV/0!	#DIV/0!	#DIV/0!	#DIV/0!	#DIV/0!	#DIV/0!
																	#DIV/0!	#DIV/0!	#DIV/0!	#DIV/0!	#DIV/0!	#DIV/0!	#DIV/0!	#DIV/0!	#DIV/0!
																	PC	T.a conc.1	T.a conc.2	T.h S1 conc.1	T.h S1 conc.2	T.h S2 conc.1	T.h S2 conc.2	Cons conc.1	Cons conc.2
																		0.556667	1.22333	1.22333	1.44333	1.44333	2.33333	2.77667	3.77667
													Increase over over positive					0.135442	0.297648	0.297648	0.351176	0.351176	0.567721	0.675588	0.918897
																	PC	T.a conc.1	T.a conc.2	T.h S1 conc.1	T.h S1 conc.2	T.h S2 conc.1	T.h S2 conc.2	Cons conc.1	Cons conc.2
Don't touch it																		13.5442	29.7648	29.7648	35.1176	35.1176	56.7721	67.5588	91.8897
For ANOVA																		0.135442	0.297648	0.297648	0.351176	0.351176	0.567721	0.675588	0.918897
Treatment	DS
NC	0
NC	0
NC	0
PC	4
PC	3.33
PC	5
T.a conc.1	3.33
T.a conc.1	3.33
T.a conc.1	4
T.a conc.2	3
T.a conc.2	2.66
T.a conc.2	3
T.h S1 conc.1	3
T.h S1 conc.1	2.66
T.h S1 conc.1	3
T.h S1 conc.2	2
T.h S1 conc.2	3
T.h S1 conc.2	3
T.h S2 conc.1	2
T.h S2 conc.1	3
T.h S2 conc.1	3
T.h S2 conc.2	2
T.h S2 conc.2	1.33
T.h S2 conc.2	2
Cons conc.1	2
Cons conc.1	0
Cons conc.1	2
Cons conc.2	0
Cons conc.2	0
Cons conc.2	1

## Sheet:  Table DI POT YEAR 2
	NC	PC	T.a conc.1	T.a conc.2	T.h S1 conc.1	T.h S1 conc.2	T.h S2 conc.1	T.h S2 conc.2	Cons conc.1	Cons conc.2
R1	0	3	2	2	2	1	1	1	1	0
R2	0	2	2	1	1	1	2	1	0	0
R3	0	2	2	2	2	2	1	1	1	1
Average	0	2.33333	2	1.66667	1.66667	1.33333	1.33333	1	0.666667	0.333333
S.D	0	0.57735	0	0.57735	0.57735	0.57735	0.57735	0	0.57735	0.57735							don’t do any thing in this portion
S.E	0	0.333333	0	0.333333	0.333333	0.333333	0.333333	0	0.333333	0.333333
DI%		0.777778	0.666667	0.555556	0.555556	0.444444	0.444444	0.333333	0.222222	0.111111
	GRAPH		ANOVA
	NC	0	f
	PC	2.33333	a
	T.a conc.1	2	ab
	T.a conc.2	1.66667	a-c
	T.h S1 conc.1	1.66667	a-c										Decrease over negative				Percentile Graph
	T.h S1 conc.2	1.33333	b-d														PC	T.a conc.1	T.a conc.2	T.h S1 conc.1	T.h S1 conc.2	T.h S2 conc.1	T.h S2 conc.2	Cons conc.1	Cons conc.2
	T.h S2 conc.1	1.33333	b-d														-2.33333	-2	-1.66667	-1.66667	-1.33333	-1.33333	-1	-0.666667	-0.333333
	T.h S2 conc.2	1	c-e														#DIV/0!	#DIV/0!	#DIV/0!	#DIV/0!	#DIV/0!	#DIV/0!	#DIV/0!	#DIV/0!	#DIV/0!
	Cons conc.1	0.666667	d-f														PC	T.a conc.1	T.a conc.2	T.h S1 conc.1	T.h S1 conc.2	T.h S2 conc.1	T.h S2 conc.2	Cons conc.1	Cons conc.2
	Cons conc.2	0.333333	ef														#DIV/0!	#DIV/0!	#DIV/0!	#DIV/0!	#DIV/0!	#DIV/0!	#DIV/0!	#DIV/0!	#DIV/0!
																	#DIV/0!	#DIV/0!	#DIV/0!	#DIV/0!	#DIV/0!	#DIV/0!	#DIV/0!	#DIV/0!	#DIV/0!
																	PC	T.a conc.1	T.a conc.2	T.h S1 conc.1	T.h S1 conc.2	T.h S2 conc.1	T.h S2 conc.2	Cons conc.1	Cons conc.2
																		0.333333	0.666667	0.666667	1	1	1.33333	1.66667	2
																		0.142857	0.285714	0.285714	0.428571	0.428571	0.571429	0.714286	0.857143
													Increase over over positive				PC	T.a conc.1	T.a conc.2	T.h S1 conc.1	T.h S1 conc.2	T.h S2 conc.1	T.h S2 conc.2	Cons conc.1	Cons conc.2
Don't touch it																		14.2857	28.5714	28.5714	42.8571	42.8571	57.1429	71.4286	85.7143
For ANOVA																		0.142857	0.285714	0.285714	0.428571	0.428571	0.571429	0.714286	0.857143
Treatment	DS
NC	0
NC	0
NC	0
PC	3
PC	2
PC	2
T.a conc.1	2
T.a conc.1	2
T.a conc.1	2
T.a conc.2	2
T.a conc.2	1
T.a conc.2	2
T.h S1 conc.1	2
T.h S1 conc.1	1
T.h S1 conc.1	2
T.h S1 conc.2	1
T.h S1 conc.2	1
T.h S1 conc.2	2
T.h S2 conc.1	1
T.h S2 conc.1	2
T.h S2 conc.1	1
T.h S2 conc.2	1
T.h S2 conc.2	1
T.h S2 conc.2	1
Cons conc.1	1
Cons conc.1	0
Cons conc.1	1
Cons conc.2	0
Cons conc.2	0
Cons conc.2	1
