# Supplementary material for: Trichoderma based formulations control the wilt disease of chickpea (Cicer arietinum L.) caused by Fusarium oxysporum f. sp. ciceris, better when inoculated as consortia: findings from pot experiments under field conditions
Source: PeerJ journal article supplement (doi:10.7717/peerj.17835), 2024-08-19
Supplement: supplementary_file_3.zip [file SOIL ANALYSIS REPLICATES Safeer May 26 2024.xlsx]

## Sheet: Sheet1
Trichoderma soil of Chakwal			locarion 1
	pH	SOM	N	P	K	Zn	Fe	Cu
RI	7.44	0.52	3.38	5.28	96	0.93	6.19	1.18
R2	7.4	0.45	3.6	5.5	91	0.93	6.09	1.2
R3	7.66	0.47	3.52	4.82	89	0.87	5.81	1.25
Mean	7.5	0.48	3.5	5.2	92	0.91	6.03	1.21
SD	0.14	0.0360555	0.111355	0.346987	3.60555	0.034641	0.196977	0.0360555
S.E	0.080829	0.0208167	0.064291	0.200333	2.08167	0.02	0.113725	0.0208167
			location2
	pH	SOM	N	P	K	Zn	Fe	Cu
	8.2	0.61	2.1	6.2	102	0.89	5.05	1
	7.5	0.66	2	6.35	98	0.91	4.9	0.99
	8	0.65	2.2	6.9	103.4	1.02	5.06	1.1
Mean	7.9	0.64	2.1	6.48333	101.133	0.94	5.00333	1.03
SD	0.361	0.0265	0.1	0.369	2.8	0.07	0.0896	0.0608
SE
POT YEAR 1
	pH	SOM	N	P	K	Zn	Fe	Cu
RI year 1	7.41	0.53	2.7	6.3	80.98	0.64	10.5	0.37
R2 year 1	7.29	0.56	2.64	6.15	78.86	0.65	9.15	0.36
R3 year 1	7.5	0.56	2.61	5.97	78.06	0.69	9.45	0.38
Mean	7.4	0.55	2.65	6.14	79.3	0.66	9.7	0.37
SD	0.105357	0.0173205	0.0458258	0.165227	1.50891	0.0264575	0.708872	0.01
S.E	0.0608276	0.01	0.0264575	0.0953939	0.871168	0.0152753	0.409268	0.0057735
POT YEAR 2
	pH	SOM	N	P	K	Zn	Fe	Cu
RI year 2	7.5	0.62	2.4	5.5	81.5	0.63	8.49	0.42
R2 year 2	7.6	0.57	2.31	5.7	79	0.6	9.1	0.44
R3 year 2	7.43	0.61	2.28	5.6	79.5	0.63	8.72	0.46
Mean	7.51	0.6	2.33	5.6	80	0.62	8.77	0.44
SD	0.08544	0.0264575	0.06245	0.1	1.32288	0.0173205	0.308058	0.02
S.E	0.0493288	0.0152753	0.0360555	0.057735	0.763763	0.01	0.177858	0.011547
		ANOVA, Fisher’s LSD test was performed at P=5%, using Minitab 20.2.
Treatments	pH	SOM	N	P	K	Zn	Fe	Cu
c1	7.44	0.52	3.38	5.28	96	0.93	6.19	1.18
c1	7.4	0.45	3.6	5.5	91	0.93	6.09	1.2
c1	7.66	0.47	3.52	4.82	89	0.87	5.81	1.25
c2	8.2	0.61	2.1	6.2	102	0.89	5.05	1
c2	7.5	0.66	2	6.35	98	0.91	4.9	0.99
c2	8	0.65	2.2	6.9	103.4	1.02	5.06	1.1
T1	7.41	0.53	2.7	6.3	80.98	0.64	10.5	0.37
T1	7.29	0.56	2.64	6.15	78.86	0.65	9.15	0.36
T1	7.5	0.56	2.61	5.97	78.06	0.69	9.45	0.38
T2	7.5	0.62	2.4	5.5	81.5	0.63	8.49	0.42
T2	7.6	0.57	2.31	5.7	79	0.6	9.1	0.44
T2	7.43	0.61	2.28	5.6	79.5	0.63	8.72	0.46
